# Supplementary material for: The absorption and fluorescence spectra of 4-(3-methoxybenzylidene)-2-methyl-oxazalone interpreted by Franck–Condon simulation in various pH solvent environments
Source: Royal Society of Chemistry journal article supplement (doi:10.1039/d0cp01980a), 2020-01-01
Supplement: d0cp01980a1.pdf [file d0cp01980a1.pdf]

## Support information for

# The absorption and fluorescence spectra interpreted by Franck– Condon simulation for 4-(3-methoxybenzylidene)-2-methyl- oxazalone in various pH solvent environments

Yu-Hui Liu,<sup>\*a</sup> Ya-Jing Peng,<sup>a</sup> Hang Su,<sup>a</sup> Chaoyuan Zhu<sup>\*bc</sup> and Sheng-Hsien Lin<sup>b</sup>

<sup>a</sup> *College of Mathematics and Physics, Bohai University, Jinzhou 121013, China*

<sup>b</sup> *Department of Applied Chemistry and Institute of Molecular Science, National Chiao-Tung University, Hsinchu 30050, Taiwan*

<sup>c</sup> *Center for Emergent Functional Matter Science, National Chiao Tung University, Hsinchu 30010, Taiwan.*

\* Corresponding author: E-mail: [yhliu@dicp.ac.cn](mailto:yhliu@dicp.ac.cn); [cyzhu@mail.nctu.edu.tw](mailto:cyzhu@mail.nctu.edu.tw)

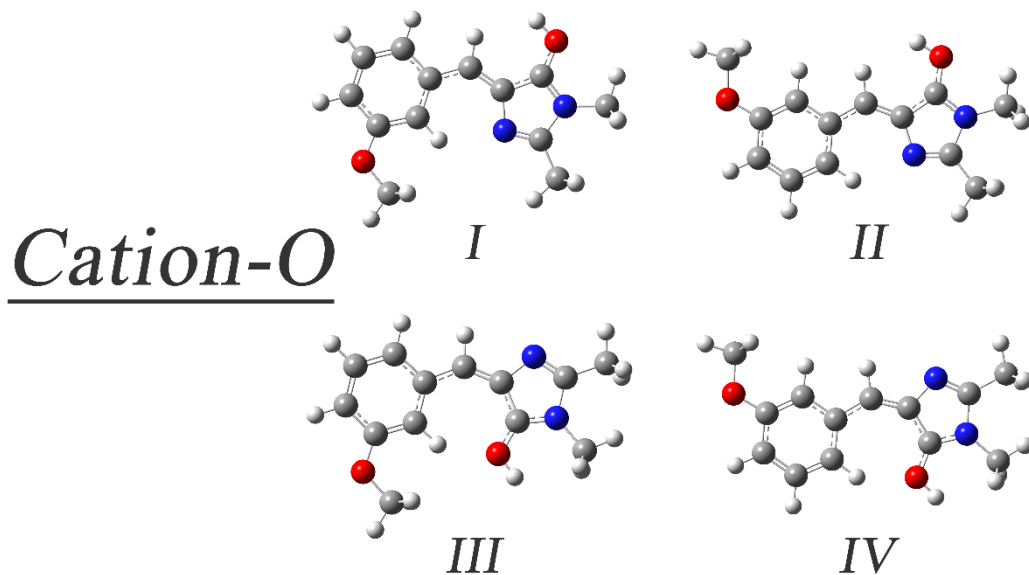

**Fig. S1** Optimized geometric structures of the Cation-O form of *m*-MeOBDI in the ground state.

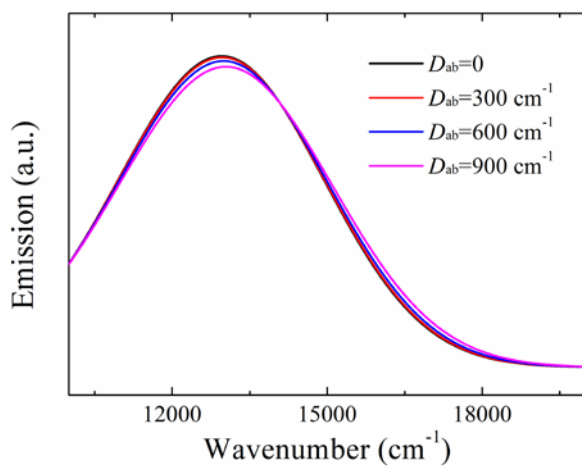

**Fig. S2** Simulated emission spectra of the DC-IV\* by using different inhomogeneous broadening parameter  $D_{ab}$ .

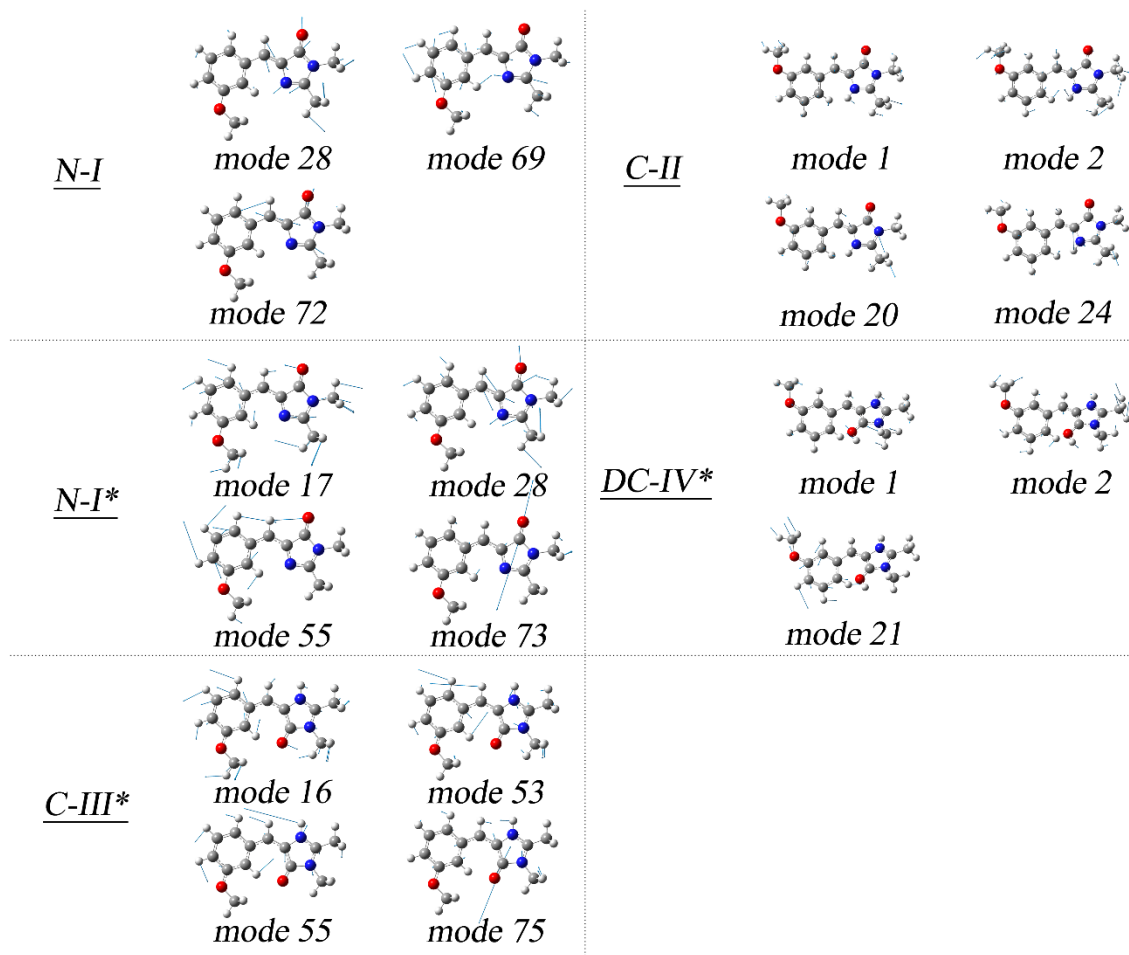

**Fig. S3** The dominating vibrational modes in the simulated absorption and emission spectra.

**Table S1** Calculated energies of the Cation-N (the cation form of *m*-MeOBDI with protonation of the N- group) and Cation-O (the cation form of *m*-MeOBDI with protonation of the C=O group) structures in both  $S_0$  and  $S_1$  states by using B3LYP and cam-B3LYP functionals.

|           |       | Cation-N |          |          |          | Cation-O |          |          |          |
|-----------|-------|----------|----------|----------|----------|----------|----------|----------|----------|
|           |       | I        | II       | III      | IV       | I        | II       | III      | IV       |
| B3LYP     | $S_0$ | -764.478 | -764.479 | -764.478 | -764.477 | -764.453 | -764.452 | -764.444 | -764.444 |
|           | $S_1$ | ---      | -764.383 | -764.385 | -764.384 | -764.365 | -764.366 | ---      | -764.336 |
| cam-B3LYP | $S_0$ | -764.088 | -764.088 | -764.087 | -764.086 | -764.061 | -764.060 | -764.052 | -764.052 |
|           | $S_1$ | -763.972 | -763.972 | -763.974 | -763.973 | -763.954 | -763.954 | -763.946 | -763.948 |

**Table S2** Calculated Electronic Excitation Energy (EEE), and corresponding Oscillator Strength (OS) of the low-lying electronically excited states for N-I and C-II species, as well as Orbital Transition (OT) contributions to the electronic excited states.

| State | N-I      |        |         | C-II     |        |       |
|-------|----------|--------|---------|----------|--------|-------|
|       | EEE (nm) | OS     | OT      | EEE (nm) | OS     | OT    |
| $S_1$ | 332.07   | 0.7361 | H→L     | 340.44   | 0.3928 | H→L   |
| $S_2$ | 296.55   | 0.0005 | H-3→L+1 | 305.25   | 0.4285 | H-1→L |
| $S_3$ | 288.95   | 0.0229 | H-1→L   | 268.43   | 0.0007 | H-3→L |
| $S_4$ | 256.38   | 0.1411 | H-2→L   | 244.85   | 0.0101 | H-2→L |
| $S_5$ | 219.32   | 0.0003 | H-5→L   | 223.24   | 0.1073 | H→L+1 |
| $S_6$ | 215.57   | 0.0745 | H→L+1   | 208.71   | 0.2125 | H→L+2 |

**Table S3** Huang–Rhys factors of the dominating normal modes for the  $S_0 \rightarrow S_1$  absorption of N-I,  $S_1 \rightarrow S_0$  emissions of N-I\* and C-III\*.

| Absorption ( $S_0 \rightarrow S_1$ ) of N-I |           |        | vs | Emission ( $S_1 \rightarrow S_0$ ) of N-I* |           |        | vs | Emission ( $S_1 \rightarrow S_0$ ) of C-III* |           |        |
|---------------------------------------------|-----------|--------|----|--------------------------------------------|-----------|--------|----|----------------------------------------------|-----------|--------|
| modes                                       | $\omega$  | $S$    |    | modes                                      | $\omega$  | $S$    |    | modes                                        | $\omega$  | $S$    |
| 17                                          | 355.1082  | 0.1353 |    | 17                                         | 349.7936  | 0.1135 |    | 4                                            | 82.6303   | 0.1057 |
| 28                                          | 724.8818  | 0.2480 |    | 28                                         | 729.1128  | 0.1338 |    | 16                                           | 318.8042  | 0.1525 |
| 52                                          | 1306.6538 | 0.1208 |    | 55                                         | 1386.7916 | 0.1228 |    | 20                                           | 435.7734  | 0.1020 |
| 69                                          | 1652.398  | 0.1915 |    | 73                                         | 1699.0021 | 0.1011 |    | 34                                           | 799.0847  | 0.1136 |
| 70                                          | 1659.0341 | 0.1170 |    |                                            |           |        |    | 53                                           | 1279.4718 | 0.1343 |
| 72                                          | 1729.3395 | 0.2569 |    |                                            |           |        |    | 55                                           | 1350.3739 | 0.1264 |
|                                             |           |        |    |                                            |           |        |    | 75                                           | 1698.7643 | 0.1321 |

**Table S4** Large and unusable Huang–Rhys factors of the high-frequency normal modes for the  $S_0 \rightarrow S_1$  and  $S_0 \rightarrow S_2$  absorptions of C-II,  $S_1 \rightarrow S_0$  emissions of DC-IV<sup>\*</sup>, which have been removed in the following FC simulations.

| Absorption ( $S_0 \rightarrow S_1$ ) of C-II |           |        | vs | Absorption ( $S_0 \rightarrow S_2$ ) of C-II |           |        | vs | Emission ( $S_1 \rightarrow S_0$ ) of DC-IV <sup>*</sup> |           |         |
|----------------------------------------------|-----------|--------|----|----------------------------------------------|-----------|--------|----|----------------------------------------------------------|-----------|---------|
| modes                                        | $\omega$  | $S$    |    | modes                                        | $\omega$  | $S$    |    | modes                                                    | $\omega$  | $S$     |
| 33                                           | 824.8164  | 1.0903 |    | 37                                           | 963.8058  | 1.7565 |    | 33                                                       | 756.8862  | 12.9309 |
| 37                                           | 963.8058  | 4.7416 |    | 43                                           | 1073.2531 | 1.1707 |    | 47                                                       | 1163.8785 | 10.3757 |
| 38                                           | 980.4851  | 3.0418 |    | 79                                           | 3118.0606 | 3.6545 |    | 82                                                       | 3180.8083 | 14.6977 |
| 46                                           | 1164.8073 | 2.0607 |    | 80                                           | 3149.0593 | 2.9396 |    | 84                                                       | 3183.6513 | 22.5716 |
| 79                                           | 3118.0606 | 2.1326 |    |                                              |           |        |    | 85                                                       | 3215.9174 | 11.6185 |
| 81                                           | 3178.6701 | 4.0055 |    |                                              |           |        |    |                                                          |           |         |

**Table S5** Huang–Rhys factors of the low-frequency normal modes for the  $S_0 \rightarrow S_1$  and  $S_0 \rightarrow S_2$  absorptions of C-II,  $S_1 \rightarrow S_0$  emissions of DC-IV<sup>\*</sup>, which are involved in the following FC simulations.

| Absorption ( $S_0 \rightarrow S_1$ ) of C-II |          |        | vs | Absorption ( $S_0 \rightarrow S_2$ ) of C-II |          |        | vs | Emission ( $S_1 \rightarrow S_0$ ) of DC-IV <sup>*</sup> |          |        |
|----------------------------------------------|----------|--------|----|----------------------------------------------|----------|--------|----|----------------------------------------------------------|----------|--------|
| modes                                        | $\omega$ | $S$    |    | modes                                        | $\omega$ | $S$    |    | modes                                                    | $\omega$ | $S$    |
| 1                                            | 29.3958  | 1.1333 |    | 1                                            | 29.3958  | 2.8618 |    | 2                                                        | 49.6738  | 6.5675 |
| 2                                            | 55.5958  | 5.1811 |    | 7                                            | 136.8322 | 0.1694 |    | 3                                                        | 71.079   | 5.5221 |
| 3                                            | 68.9975  | 0.1880 |    | 13                                           | 269.3266 | 0.1882 |    | 5                                                        | 126.212  | 2.4656 |
| 4                                            | 100.8659 | 0.1106 |    | 14                                           | 282.3839 | 0.3677 |    | 6                                                        | 140.6789 | 1.2246 |
| 7                                            | 136.8322 | 0.1305 |    | 20                                           | 498.9786 | 1.0812 |    | 12                                                       | 234.369  | 2.0150 |
| 10                                           | 211.7405 | 0.1892 |    | 21                                           | 557.9497 | 0.6141 |    | 13                                                       | 263.8674 | 1.4738 |
| 11                                           | 221.9794 | 0.2410 |    | 22                                           | 583.5515 | 0.3167 |    | 17                                                       | 338.9507 | 2.4474 |
| 12                                           | 252.5548 | 0.3915 |    | 23                                           | 594.0724 | 0.1087 |    | 19                                                       | 372.505  | 1.2110 |
| 13                                           | 269.3266 | 0.2664 |    | 24                                           | 597.6835 | 0.1963 |    | 21                                                       | 465.0474 | 4.1829 |
| 14                                           | 282.3839 | 0.5537 |    | 27                                           | 666.0833 | 0.2210 |    |                                                          |          |        |
| 16                                           | 328.3478 | 0.4046 |    | 31                                           | 773.3502 | 0.3290 |    |                                                          |          |        |
| 17                                           | 354.7018 | 0.1526 |    | 32                                           | 802.706  | 0.5083 |    |                                                          |          |        |
| 19                                           | 462.3081 | 0.1140 |    | 34                                           | 885.0354 | 0.2864 |    |                                                          |          |        |
| 20                                           | 498.9786 | 1.7425 |    | 35                                           | 927.2171 | 0.2518 |    |                                                          |          |        |
| 21                                           | 557.9497 | 0.2243 |    | 36                                           | 929.3747 | 0.2381 |    |                                                          |          |        |
| 22                                           | 583.5515 | 0.2349 |    |                                              |          |        |    |                                                          |          |        |
| 23                                           | 594.0724 | 0.1666 |    |                                              |          |        |    |                                                          |          |        |
| 24                                           | 597.6835 | 2.7904 |    |                                              |          |        |    |                                                          |          |        |
| 27                                           | 666.0833 | 0.4062 |    |                                              |          |        |    |                                                          |          |        |
| 28                                           | 674.7309 | 1.5607 |    |                                              |          |        |    |                                                          |          |        |
